# Supplementary material
Source: PubMed Central journal article supplement (PMC2664028)
Supplement: 0809592106_0809592106SI.pdf [file 0809592106_0809592106SI.pdf]

# Supporting Information

Robson et al. 10.1073/pnas.0809592106

## SI Equations

**One-Site Ligand Binding.** SecYEG binding to SecA promotes an activation of ATPase activity, and was used as a measure of binding to the steady-state complex (SecA:ADP). The data obtained were fitted using a 1-site ligand binding equation with background, defined as:

$$[B] = \frac{B \max \cdot [L]}{K_d + [L]} + \text{Background} \quad [1]$$

where  $[B]$  is equal to the amount of ligand bound,  $B \max$  is the total capacity of SecA-ligand,  $[L]$  is the ligand concentration and  $K_d$  is the dissociation constant for SecA-ligand.

**Analysis of ATP Binding.** The steady-state kinetics of ATP turnover were fitted according to the Michaelis–Menten equation, defined as:

$$v = \frac{V \max \cdot [S]}{K_M + [S]} \quad [2]$$

where  $v$  is equal to the measured velocity;  $K_M$  is the Michaelis constant;  $V_{\max}$  is the maximum velocity;  $[S]$  is the substrate concentration.

**One-site quadratic tight ligand binding.** Data for proOmpA binding to SecA:ADP from the measurement of ATPase activity were fitted to a 1-site quadratic tight ligand binding equation (as the affinity for translocation sites was close to the concentration of SecA) with background, defined as:

$$v = V \max$$

$$\frac{[L] + [Eo] + K_d - \sqrt{([L] + [Eo] + K_d)^2 - 4[Eo][L]}}{2[Eo]}$$

$$+ \text{Background} \quad [3]$$

where  $v$  is equal to enzyme velocity,  $V_{\max}$  is the maximum enzyme velocity,  $[L]$  is the total ligand concentration,  $[Eo]$  is total SecA concentration, and  $K_d$  is the dissociation constant for SecA-ligand.

**Single Exponential Plus Steady-State.** Data from all transient kinetic ATPase experiments were fitted to a single exponential equation, plus the linear component of the steady-state activity, defined as:

$$A = A_0 \cdot (1 - e^{-k \cdot t}) + m \cdot t + \text{offset} \quad [4]$$

where  $A$  is the calculated amplitude,  $A_0$  is the amplitude of the exponential phase (stoichiometry of the first hydrolytic turnover),  $t$  is the time,  $k$  is the rate constant,  $m$  is the slope of the reaction (steady-state rate) and the *offset* is the initial value of the data (0 in some cases).

**Single Exponential Equation.** Data from the ADP release experiment were fitted to a single exponential equation according to Eq. 4 where  $m = 0$ , because there is no linear component to this transient.
